# Supplementary material for: Increased Expression of Vascular Endothelial Growth Factor-D Following Brain Injury
Source: MDPI journal article supplement (doi:10.3390/ijms20071594), 2019-03-30
Supplement: s1 [file s1]

### VEGF-D Protein Expression

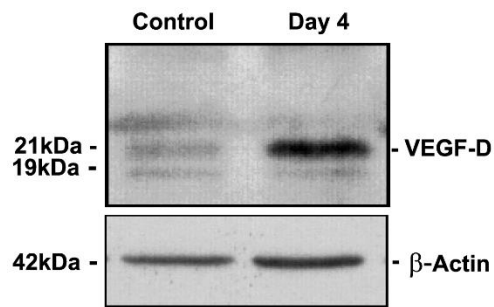

**Figure S1** Image from a representative western blot showing increased VEGF-D expression (21 kDa) in the brain of a day 4 cold-injured rat as compared to the control rat brain. Immunoblotting was performed as described previously [30].
